# Supplementary material for: GPR40 modulates epileptic seizure and NMDA receptor function
Source: PubMed Central journal article supplement — Sci Adv. 2018 Oct 17;4(10):eaau2357. doi: 10.1126/sciadv.aau2357 (PMC6192686; doi:10.1126/sciadv.aau2357), 2018-10-17
Supplement: aau2357_SM.pdf [file aau2357_SM.pdf]

## Supplementary Materials for

### **GPR40 modulates epileptic seizure and NMDA receptor function**

Yong Yang, Xin Tian, Demei Xu, Fangshuo Zheng, Xi Lu, Yanke Zhang, Yuanlin Ma, Yun Li, Xin Xu, Binglin Zhu\*, Xuefeng Wang\*

\*Corresponding author. Email: zhubinglin0311@163.com (B.Z.); xfyp@163.com (X.W.)

Published 17 October 2018, *Sci. Adv.* **4**, eaau2357 (2018)  
DOI: 10.1126/sciadv.aau2357

#### **This PDF file includes:**

- Fig. S1. Immunofluorescent labeling of GPR40 in nonepileptic brain tissues.
- Fig. S2. Immunofluorescent labeling of GPR40 in epileptic tissues.
- Fig. S3. Immunofluorescence intensity of GPR40 in epileptic and nonepileptic brain tissues.
- Fig. S4. GPR40 has no effect on PPR for NMDA-mediated EPSCs.
- Fig. S5. GPR40 regulates spine density.
- Table S1. Clinical characteristics of epileptic patients in this study.
- Table S2. Clinical characteristics of control individuals with brain trauma.

## Supplementary Materials

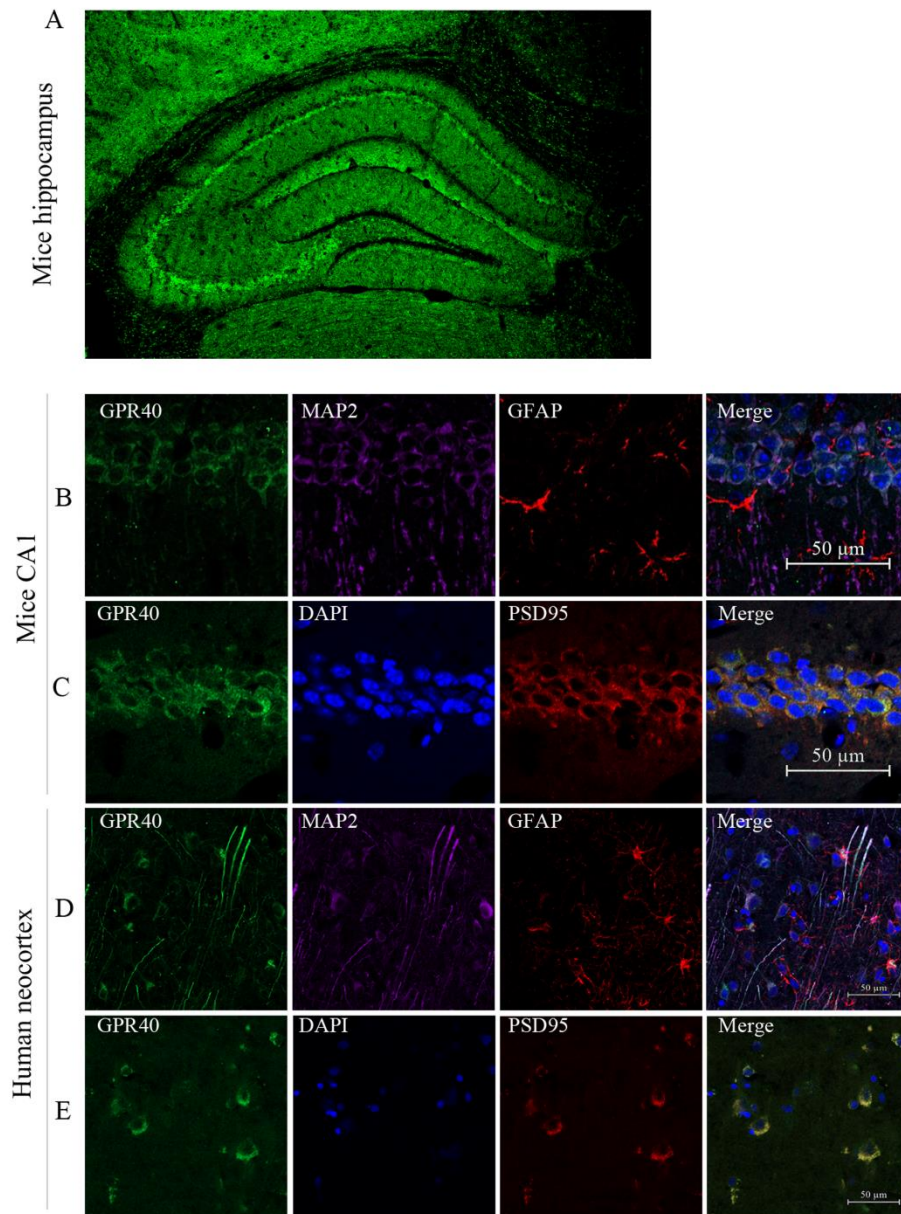

**Fig. S1. Immunofluorescent labeling of GPR40 in nonepileptic brain tissues. (A)** GPR40 localization in the hippocampus. **(B and C)** In hippocampal tissue from healthy mice, GPR40 colocalized with Map2 and with PSD95 but not with GFAP. **(D and E)** In the temporal neocortices from non-epileptic patients, GPR40 colocalized with Map2 and with PSD95 but not with GFAP (scale bar=50 μm).

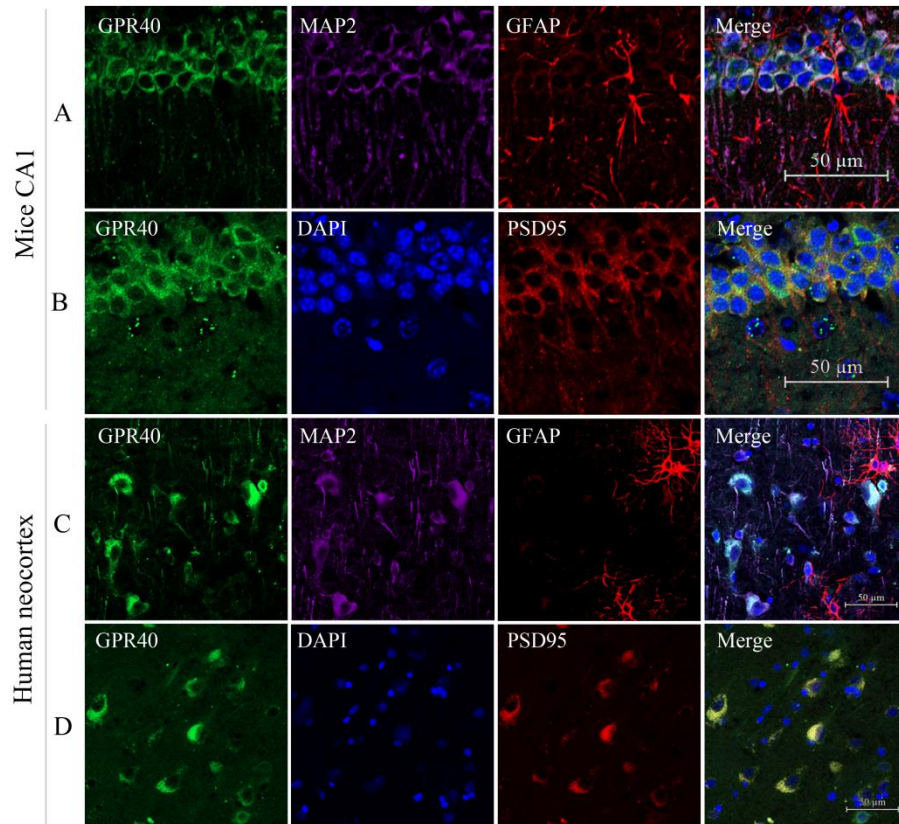

**Fig. S2. Immunofluorescent labeling of GPR40 in epileptic tissues. (A and B)** In hippocampal tissue from a mouse TLE model, GPR40 colocalized with Map2 and with PSD95 but not with GFAP. **(C and D)** In the temporal neocortices from TLE patients, GPR40 colocalized with Map2 and with PSD95 but not with GFAP (scale bar=50 μm).

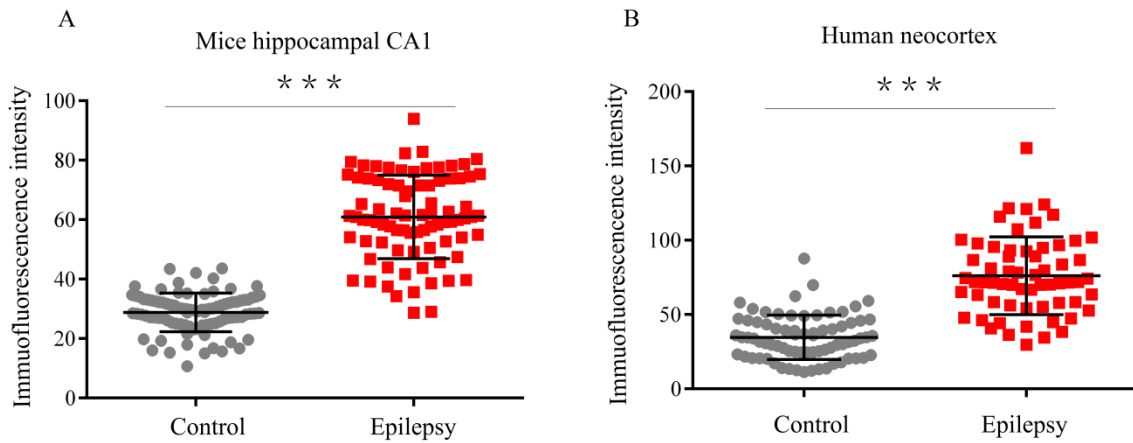

**Fig. S3. Immunofluorescence intensity of GPR40 in epileptic and non-epileptic brain tissues.** (A) GPR40 immunoreactivity was increased in the hippocampal CA1 region of mice from the KA-induced model compared with controls (Control n=93, Epilepsy n=73). (B) GPR40 immunoreactivity was increased in the neocortex of TLE patients compared with non-epileptic controls (Control n=74, Epilepsy n=62). Data are shown as the means  $\pm$  s.e.m.; Student's t-test, \*\*\* $p < 0.001$ .

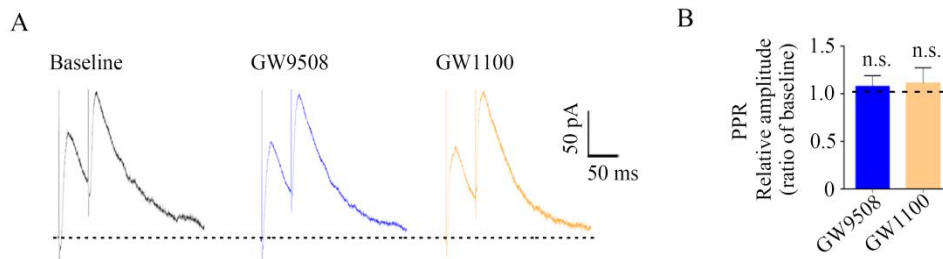

**Fig. S4. GPR40 has no effect on PPR for NMDA-mediated EPSCs.** (A and B) Representative traces of the PPR for NMDA-mediated EPSCs and summary of the PPR among the groups. For the analysis, n=6 in each group. The effect of each treatment was normalized to the baseline; error bars represent the mean  $\pm$  s.e.m.; n.s., not significant, paired t-test.

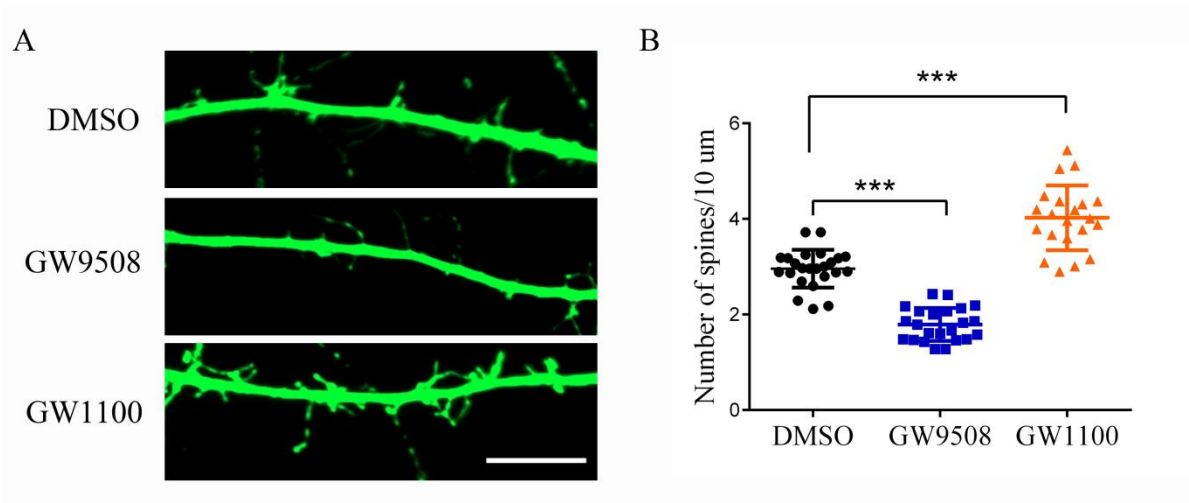

**Fig. S5. GPR40 regulates spine density.** (A) Representative confocal images showing the spine density on cultured hippocampal neurons after treatment with 0.1% DMSO, GW9508 (20  $\mu$ M) or GW1100 (20  $\mu$ M), scale bar = 10  $\mu$ m. (B) The summarized result of the spine density (DMSO n=24, GW9508 n=23, GW1100 n=21, one-way ANOVA followed by Tukey's test, \*\*\*p < 0.001).

**Table S1. Clinical characteristics of epileptic patients in this study.**

| Case  | Gender/Age (years) | Course (years) | AEDs before surgery | Resection tissue | Neuropathological diagnosis |
|-------|--------------------|----------------|---------------------|------------------|-----------------------------|
| EP 1  | M/25               | 11             | PB, VPA, LTG        | RTN              | G, NL                       |
| EP 2  | F/30               | 11             | VPA, PB, PHT, TPM   | LTN              | G, NL                       |
| EP 3  | M/18               | 15             | PHT, PB, CBZ, VPA   | RTN              | G                           |
| EP 4  | M/22               | 18             | VPA, CBZ, PHT       | LTN              | NL, G                       |
| EP 5  | F/26               | 7              | CBZ, VPA, TPM       | LTN              | G                           |
| EP 6  | F/36               | 10             | PB, CBZ, VPA, OXC   | RTN              | NL, G                       |
| EP 7  | F/12               | 5              | CBZ, TPM, LTG,      | LTN              | NL, G                       |
| EP 8  | F/21               | 8              | TPM, VPA, CBZ       | LTN              | G                           |
| EP 9  | F/23               | 6              | TPM, CBZ, VPA       | RTN              | G                           |
| EP 10 | F/20               | 7              | VPA, OXC, PB        | RTN              | NL, G                       |
| EP 11 | M/9                | 6              | CBZ, PB, LTG        | LTN              | NL                          |
| EP 12 | F/33               | 15             | OXC, CBZ, TPM, PB   | LTN              | NL, G                       |
| EP 13 | F/14               | 5              | CBZ, LTG, TPM,      | RTN              | NL,                         |
| EP 14 | F/18               | 13             | CBZ, VPA, TPM       | LTN              | NL, G                       |
| EP 15 | F/25               | 14             | VPA, CBZ, LTG       | LTN              | NL                          |
| EP 16 | F/24               | 6              | CBZ, VPA, TPM       | LTN              | G                           |
| EP 17 | M/20               | 7              | VPA, TPM, PB        | RTN              | G, NL                       |
| EP 18 | F/14               | 9              | VPA, CBZ, PB        | RTN              | NL, G                       |
| EP 19 | M/21               | 6              | CBZ, VPA, TPM, PHT  | RTN              | NL                          |
| EP 20 | M/39               | 10             | CBZ, VPA, TPM       | LTN              | NL, G                       |

EP=epilepsy patients; C=control; F=female; M=male; AEDs=antiepileptic drugs; CBZ=carbamazepine; VPA=valproate; TPM= topiramate; PHT=phenytoin; PB=phenobarbital; LTG=lamotrigine; OXC=oxcarbazepine; LTN=left temporal neocortex; RTN=right temporal neocortex; G=gliosis; NL=neuron loss.

**Table S2. Clinical characteristics of control individuals with brain trauma.**

| Case   | Gender/Age (years) | Mechanism of injury | GCS score | Time to surgical intervention (hours) | Resection tissue | Neuropathological diagnosis |
|--------|--------------------|---------------------|-----------|---------------------------------------|------------------|-----------------------------|
| TBI 1  | M/11               | MVA                 | 7         | 15                                    | LTN              | N                           |
| TBI 2  | F/38               | Fall                | 7         | 20                                    | LTN              | N                           |
| TBI 3  | M/40               | MVA                 | 5         | 15                                    | LTN              | N                           |
| TBI 4  | F/34               | Stumble             | 8         | 17                                    | LTN              | N                           |
| TBI 5  | M/30               | MVA                 | 6         | 11                                    | RTN              | N                           |
| TBI 6  | F/17               | MVA                 | 7         | 18                                    | RTN              | N                           |
| TBI 7  | M/11               | MVA                 | 9         | 22                                    | RTN              | N                           |
| TBI 8  | M/25               | MVA                 | 5         | 12                                    | RTN              | N                           |
| TBI 9  | F/8                | Stumble             | 6         | 15                                    | LTN              | N                           |
| TBI 10 | M/20               | MVA                 | 7         | 19                                    | RTN              | N                           |

TBI= traumatic brain injury; F=female; M=male; MVA=motor vehicle accident; GCS= Glasgow Coma Scale; LTN=left temporal neocortex; RTN=right temporal neocortex; N=relative normal.
